# Cell region fingerprints enable highly precise single-cell tracking and lineage reconstruction

Andreas P. Cuny<sup>1,2</sup>, Aaron Ponti<sup>1</sup>, Tomas Kündig<sup>1</sup>, Fabian Rudolf<sup>1,2</sup>, and Jörg Stelling<sup>1,2,\*</sup>

<sup>1</sup> Department of Biosystems Science and Engineering, ETH Zurich, Mattenstrasse 26, 4058 Basel

<sup>2</sup> Swiss Institute of Bioinformatics, Mattenstrasse 26, 4058 Basel

\* Correspondence to: [joerg.stelling@bsse.ethz.ch](mailto:joerg.stelling@bsse.ethz.ch)

Experimental studies of cell growth, inheritance, and their associated processes by microscopy require accurate single-cell observations of sufficient duration to reconstruct the genealogy. However, cell tracking—assigning identical cells on consecutive images to a track—is often challenging due to imperfect segmentation, moving cells, or focus drift, resulting in laborious manual verification. Here, we propose fingerprints to identify problematic assignments rapidly. A fingerprint distance measures the similarity between cells in two consecutive images by comparing the structural information contained in the low frequencies of a Fourier transform. We show that it is broadly applicable across cell types and image modalities, provided the image has sufficient structural information. Our tracker (*Trac<sup>X</sup>*) uses the concept to reject unlikely assignments, thereby substantially increasing tracking performance on published and newly generated long-term data sets from various species. For *S. cerevisiae*, we propose a comprehensive model for cell size control at the single-cell and population level centered on the Whi5 regulator. It demonstrates how highly precise tracking can help uncover previously undescribed single-cell biology.

## Introduction

Live-cell imaging is the primary tool to study dynamics processes and their inheritance across generations at the single-cell level. It also enables novel applications to identify and isolate cells with a dynamic phenotype of interest<sup>1</sup> and to connect genotype with phenotype by imaging-based screening<sup>2</sup>. The analysis starts from often large sets of raw images (**Fig. 1a**), in which objects such as cells have to be identified by segmentation methods (**Fig. 1b**). One then needs to establish the temporal relationship between all the segmented objects in each image in a task termed tracking (**Fig. 1c**). Accurate tracking

24 is essential, especially when studying inheritance or differentiation, which requires complete cell lin-  
25 eages, that is, the genealogy (**Fig. 1d**). For example, lineage-based analysis recently revealed long-term  
26 memory linking cell growth and cell cycle progression in mammalian cells<sup>3</sup> and suggested asymmetric  
27 inheritance as a key mechanism determining hematopoietic stem cell fate<sup>4</sup>.

28 With important progress in cell segmentation methods that often involve deep learning approaches<sup>5</sup>  
29 and generalize across cell types and imaging modalities<sup>6</sup>, cell tracking is the main current bottleneck  
30 for reliable image analysis at high throughput<sup>7</sup>. In addition to inaccurate segmentation results used for  
31 tracking, different events during the life of a cell, such as birth, division, changing morphology during  
32 growth, death, and migration (see **Fig. 1e** for examples) make tracking a challenging task. Importantly,  
33 incorrect assignments of cells to tracks propagate during lineage reconstruction, such that even minor  
34 tracking inaccuracies can impact the biological interpretation of the imaging data substantially.

35 In addressing the well-recognized need for better tracking tools<sup>8-11</sup>, methods for the automated vali-  
36 dation of tracking results are critical. They could alleviate the limitations on accuracy and throughput  
37 imposed by the need for laborious manual curation. Current tools only allow for a software-assisted  
38 or user-driven detection of tracking errors based on a resulting lineage<sup>9</sup> and for a manual inspection of  
39 tracking results<sup>8,11,12</sup> with possible interactive correction<sup>13-15</sup>. First deep learning-based tracking meth-  
40 ods show great promise, for example, with 1% error rate when extensive training data was available, but  
41 non-competitive results with limited training data<sup>16</sup>. The problem of manual curation to establish a  
42 ground truth for cell tracking, hence, is a general one when large data sets need to be processed for anal-  
43 ysis or training purposes. It is even more extreme for real-time applications such as automated control  
44 of single-cell behavior using optogenetics<sup>17</sup>.

45 To assess cell tracking results automatically, we took inspiration from approaches in image watermark-  
46 ing and matching that compare the structures of images<sup>18-20</sup>. We reasoned that we can compare a cell  
47 and its surrounding between consecutive images to identify correct cell-to-track assignments. Specifi-  
48 cally, we devised a cell region fingerprint (*CRF*) that captures the structural information, that is, basic  
49 image attributes representing the structure of depicted objects, and not luminance and contrast. It does  
50 not require extensive training because we need few parameters that have a direct physical interpretation  
51 and can be estimated from a few image frames. The approach allows to identify problematic tracking  
52 results even when the ground truth is unknown and it is independent of, for example, specific segmenta-  
53 tion or tracking algorithms. We use the *CRF* in a new tracker that, akin to kinetic proofreading, rejects  
54 linkages likely to be wrong. Performance tests of our methods with published data sets and newly  
55 acquired data for various cell types and image modalities demonstrate near-perfect tracking accuracy.  
56 This allowed us to reconstruct the genealogy of symmetrically and asymmetrically dividing cell types  
57 in general, and to analyze *S. cerevisiae*'s cell size regulation and homeostasis comprehensively.

## 58 Results

### 59 Cell region fingerprints capture relevant structural information

60 A cell region fingerprint (*CRF*) aims to characterize a cell and its surrounding such that we can use  
61 these characteristics to identify correct cell-to-track assignments. We calculate the fingerprint from  
62 the same raw images used for segmentation, by defining a square region around a cell's centroid to  
63 also include the cell's neighborhood (**Fig. 2a**; see **Methods** for details). Note that one can use any  
64 segmentation tool that creates a mask of the segmented objects (labeled segmentation mask) to derive  
65 the cell centroids. Individual badly segmented cells will be detected in a time series by a changing  
66 signature, but the *CRF* alone does not tell if a segmentation is good or bad. After cropping the rest of  
67 the image (**Fig. 2b**), we scale the image matrix to a defined size that is identical for all cells (**Fig. 2c**). To  
68 extract structural information, we Fourier transform the image using the discrete cosine transformation  
69 (DCT; **Fig. 2d**). The lowest frequencies of the DCT contain the structural information of the image, as  
70 demonstrated by the inverse DCT in **Fig. 2e**. We therefore define the *CRF* as a matrix that contains only  
71 DCT coefficients for the lowest frequencies (**Fig. 2f**). This procedure implies that the *CRF* computation  
72 depends only on three parameters: the size of the image window, the re-scaling factor, and the number  
73 of DCT frequencies to include.

74 To compare any pair of cells in principle, but possible assignments between pairs of cells in two consec-  
75 utive images in live-cell microscopy for the tracking problem specifically, we next define a fingerprint  
76 distance as a scalar measure of similarity. It is the normalized sum of squared residuals between two  
77 *CRF* arrays, denoted by  $d_f$  (see **Methods**). By construction,  $d_f = 0$  for identical image regions, and  
78 it increases the more the two regions differ. **Fig. 2g** indicates that the information condensed in the  
79 fingerprint distance may indeed be sufficient to distinguish between correct and incorrect tracking as-  
80 signments: the correctly assigned cell pairs on the diagonal have the lowest  $d_f$  values of all possible  
81 assignments.

82 To construct a classifier that distinguishes between correct and incorrect tracking results, we reasoned  
83 that the *CRF* is less likely to be unique for an entire microscopy image because geometrically simple  
84 cells such as round or rod-shaped cells show repeating patterns within a densely populated image. We  
85 therefore limit the comparison of fingerprints via the fingerprint distance to smaller regions, namely the  
86 neighborhood of a cell of interest. Specifically, we compute  $d_f$  between a cell in the preceding frame  
87 and the assigned cell in the current frame as well as this cell's neighbors. Our measure for classification  
88 is then the fraction of neighboring cells in the current frame that has a lower  $d_f$  than the assigned cell,  
89 the neighborhood fraction denoted by  $F_f$  (see **Methods** for details). We reason that higher values of  $F_f$   
90 suggest more possible alternative assignments, and thereby a higher likelihood that the given assignment  
91 is incorrect. Overall, thus, we condense the structural information of cells and their surrounding into a  
92 simple and intuitive measure for the evaluation of tracking results for each cell.

### 93 **Fingerprints classify tracking assignments reliably and generically**

94 A classifier for tracking assignments needs to reliably distinguish correct from incorrect assignments.  
95 It should also be generic (applying to multiple cell types and imaging modalities) and robust (insensi-  
96 tive to specific parameter settings and experimental artifacts). To assess these aspects of *CRF*-based  
97 classification, we obtained or constructed the ground truth for published data sets of different cell types,  
98 image modalities, and magnifications (see examples in **Fig. 3a** and **Methods**). We then randomly per-  
99 muted 1% of the assignments to create faulty tracks. Neighborhood fractions ( $F_f$ ) were computed with  
100 (jointly) varying parameter values for window side length ( $f_l$ ), re-size factor ( $f_r$ ), and number of DCT  
101 coefficients ( $f_q$ ). Finally, we classified the assignments by whether  $F_f$  exceeds a fixed, global threshold  
102  $\tau_f$ . Specifically, we used  $F_f > \tau_f$  ( $F_f \leq \tau_f$ ) to predict incorrect (correct) assignments (see **Methods**).

103 We conducted systematic performance tests by evaluating predictions against the ground truth, initially  
104 with a conservative  $\tau_f = 0$ . Using the F-score (the harmonic mean of precision and recall; see **Meth-**  
105 **ods**) as performance metric revealed five features of our *CRF*-based classifier. First, it can achieve  
106 near-perfect performance for all our test cases, which include different cell types (bacterial, yeast, and  
107 mammalian) as well as imaging modalities (phase contrast, bright field, and fluorescence; **Fig. 3b**). Sec-  
108 ond, to capture enough structural information in the image, a low number of DCT coefficients ( $f_q \approx 10$ )  
109 is optimal. Third and interestingly, the classifier performance increases monotonically with window  
110 size in the tested range (**Fig. 3b**), although the corresponding neighborhoods can include a hundred  
111 cells (**Fig. 3c**). Fourth, across all test cases, performance is consistently high for common parameter  
112 settings of  $f_q = 8$  and window size of twice the mean cell diameter (corresponding to  $\approx 2$ -10 neighboring  
113 cells; **Fig. 3b,c**). Finally, classifier performance does not depend on the re-size factor ( $f_r$ ; **Fig. S1**).

114 Overall, our *CRF*-based classifier shows robust and generic high performance. Reliable classification  
115 requires only generic parameters, or parameters easily derived from the images, such as the cell diam-  
116 eter. Importantly, setting the threshold of a classifier without knowing the ground truth is a frequent  
117 problem—but as additional tests for all image modalities showed (**Fig. S2**), not for the *CRF*-based eval-  
118 uation of tracking assignments.

### 119 **Assignment proof reading improves tracker performance**

120 To demonstrate practical relevance of our classifier for live cell tracking, we aimed to improve an existing  
121 tracker to be able to handle imperfect input, such as missing or miss-segmentation and moving cells. The  
122 basic idea was to proofread (preliminary) assignments with the *CRF*-based classifier and to re-evaluate  
123 questionable ones. We termed the tracker *Trac<sup>X</sup>*, analogous to our segmentation software *CellX*<sup>21,22</sup>.

124 Briefly, we adapted a simple frame-by-frame tracker<sup>23</sup> to obtain raw assignments. We use cell fea-  
125 tures such as position, size, and orientation to construct a cost matrix and then solve the linear as-  
126 signment problem (LAP) by minimizing the cost matrix between two consecutive frames with the



127 Jonker-Volgenant algorithm<sup>24</sup>, an improved version of Kuhn’s algorithm<sup>25</sup>. This yields assigned and  
128 non-assigned cells. Next, we classify the raw assignments. Those that do not pass the classifier are  
129 deleted and the corresponding cells are designated non-assigned. All non-assigned cell are then joined  
130 (for a certain ‘lifetime’) with all cells in the next frame(s) for re-evaluation. However, this approach  
131 only works for cells with a slowly changing neighborhood. To capture when cells move rapidly or two  
132 growing colonies fuse, we built on the idea of neighborhood preserved motion: the motion of a single  
133 cell needs to follow the motion of its direct neighborhood<sup>26</sup>. Our tracking refinement module (**Fig. S7**)  
134 uses the assignments that pass the classifier to form a temporary ground truth. From it, we estimate the  
135 vector field of cell movement for the re-evaluation of assignments (see **Methods** and **Supplementary**  
136 **Text** for details).

137 To evaluate the performance of *Trac*<sup>X</sup> systematically in comparison to state-of-the-art trackers, we used  
138 the yeast image toolkit (YIT)<sup>11</sup>. It is a collection of manually curated *S. cerevisiae* imaging data sets  
139 with different numbers of cells and image frames, designed for systematic comparisons of segmentation  
140 and tracking tools. Specifically, we compared the long-term tracking performance of *Trac*<sup>X</sup> measured  
141 by an F-score (see **Methods** for details) to the published results for the five best-performing trackers  
142 on these data sets<sup>10,11</sup>: CellTracer<sup>27</sup>, CellProfiler<sup>28</sup>, CellID<sup>29</sup>, CellStar<sup>11</sup>, and the algorithm by Wood *et*  
143 *al.*<sup>30</sup>. The comparatively simple *Trac*<sup>X</sup> tracked all YIT data sets, and also quantitatively it outperformed  
144 all the other algorithms (**Fig. 4a**). A tracker based on the fingerprint distance alone (*Trac*<sup>X</sup><sub>CRF</sub>) did not  
145 yield consistent long-term performance. Data set YIT-TS3 stands out: only our algorithm assigns all  
146 cells correctly in this time series of densely growing cells with one colony translating and merging with  
147 two other colonies (exemplified in **Fig. 4b**).

148 We also intended CRF-based classification to support targeted manual curation of results from any  
149 tracker—manual verification of each assignment is impractical for large data sets with thousands of  
150 linkages. *Trac*<sup>X</sup> calculates post-tracking  $F_f$  values for all assignments to highlight potentially problem-  
151 atic cell tracks or image frames. For the perfectly tracked (compared to the manual ground truth) data  
152 set YIT-TS3, classification with  $\tau_f = 0$  indicates 72 out of 2286 assignments as problematic (**Fig. 4b**).  
153 For example, it highlights potential issues in frames 12-14, which are challenging for tracking because  
154 two colonies merge and move. These are false positives, but their number is comparatively low. We  
155 tested this systematically for a yeast data set with many cells and high imaging frequency (TS-SC9; see  
156 **Table S2**). **Fig. 4c** shows fractions of false positives (and corresponding efforts for manual curation)  
157 in low percentages for conservative threshold choices. In addition, it emphasizes the importance of a  
158 sufficiently high imaging frequency, adapted to the tracking problem (see also **Fig. S4**). Hence, CRFs  
159 help for high-precision automatic cell tracking and for efficient manual curation.

## 160 **Genealogies can be reconstructed with minimal additional information**

161 To study cellular processes and their inheritance over multiple generations, one needs to reconstruct  
162 the genealogy (or lineage). It is represented as a tree where the tracks of the offspring are linked to the  
163 tracks of their mothers. Since we obtain tracks of high quality, we reasoned that we can create heritage  
164 assignments with minimal additional input. For this purpose, we developed algorithms for different cell  
165 types and cell division types (see **Methods** for details).

166 For asymmetrically dividing cells such as *S. cerevisiae*, we require an additional fluorescent marker  
167 that links mother and daughter cells. Here, we used Myo1, a protein localizing to the bud neck<sup>31</sup>.  
168 We determine assignments from the overlap of the marker with potential mother and daughter cells on  
169 each frame (**Fig. 5a**) and verify them using line profiles between mother and (future) daughter centroids  
170 (**Fig. 5b,c** and **Fig. S3**). With our own *S. cerevisiae* data (SC-TS7; see **Methods**), the algorithm correctly  
171 assigned all mother-daughter pairs (two seeding cells divided 122 times to a final 245 cells **Fig. 5d** and  
172 **Movie S1**).

173 For rod-shaped or other sturdy, symmetrically dividing cells such as fission yeast or bacteria, the algo-  
174 rithm tries to solve the genealogy using simple geometry, without additional input. Assignments are  
175 based on the shortest distance between the poles of the potential pair of daughter cells and the centroid  
176 of the mother cell (**Fig. 5e,f**). Thereby, the genealogy and the pole age can be determined directly. We  
177 tested the algorithm using *S. pombe* data (**Fig. 5g**) as well as a published ground truth data set of grow-  
178 ing *Bacillus megaterium* cells<sup>32</sup> (see details in **Table S2**). We obtained error-free lineages (4 seeding  
179 cells divided 66 times to a final number of 111 cells. All 111 tracks were correct (**Fig. 5g, Movie S2**),  
180 and 8 seeding cells divided 92 times to a final number of 160 cells; all 160 tracks were correct (**Movie**  
181 **S3**).

182 For amorphous or convex-shaped, symmetrically dividing cells such as HeLa or embryonic stem cells,  
183 we modified this algorithm because one cannot easily determine cell poles. Without conserved cell  
184 shapes, we assume area conservation to solve the lineage via a linear assignment problem that incor-  
185 porates distances between centroid positions as well as differences in cell areas into the cost matrix  
186 (**Fig. 5h,i**; see **Methods** for details). For a subset of test data set of mammalian (HeLa) cells<sup>33</sup>, we  
187 again obtained the correct lineage (4 seeding cells, 8 divisions, 20 final cells with correct tracks, 5j,  
188 **Movie S4**; recall for the full data set of 0.89 (236 / 264 cells correct), **Movie S5**). Overall, this supports  
189 versatility and precision of *Trac*<sup>X</sup> also for lineage reconstruction.

## 190 **Lineage analysis suggests a comprehensive concept for cell size homeostasis in *S. cerevisiae***

191 To demonstrate the application potential of *Trac*<sup>X</sup>, we revisited the fundamental question how yeast cells  
192 control their size depending on nutrient availability. It has the aspect of how individual cells define the  
193 set-point for size control, specifically for leaving the G<sub>1</sub> phase of the cell cycle (in a transition termed

194 Start in *S. cerevisiae*) when they reach a critical size. Such size control with stochastic elements is well-  
195 established at the single-cell level<sup>34</sup>. An intriguing molecular hypothesis is that differential scaling of  
196 Start inhibitor (with Whi5 as a dominant actor) and activator (such as G<sub>1</sub> cyclin Cln3) concentrations  
197 with cell volume establishes size control. In such models, high inhibitor concentrations allow new-  
198 born cells to grow sufficiently in G<sub>1</sub> until the balance shifts to activators at Start<sup>35–37</sup>. Whi5 levels may  
199 also provide a memory of environmental conditions (growth rates), and thus modulate size set-points  
200 according to nutrient availability<sup>38</sup>. However, the other, largely elusive aspect is cell size homeosta-  
201 sis: irrespective of the presence of most known regulators, cell size distributions of yeast populations  
202 are equally narrow<sup>37</sup>. Because cell size control and homeostasis are highly multi-factorial<sup>39</sup>, focusing  
203 on (multiple) molecular regulators<sup>35,36,40</sup>, nutrient conditions<sup>38,41–43</sup>, or lineage analysis<sup>44</sup> alone may  
204 therefore be too limiting.

205 Aiming for a more integrative analysis, we acquired single-cell and corresponding lineage data for *S.*  
206 *cerevisiae* strains carrying fluorescent markers for Whi5 and Myo1 and growing in three different glu-  
207 cose concentrations (0.05 mM, 0.2 mM, and 100 mM) in a controlled microfluidic setup for up to six  
208 generations (see **Methods** for details). **Fig. 6a** shows the long-term dynamics of an example yeast cell  
209 at the highest glucose concentration. Parameters obtained by image analysis include cell and bud (i.e.,  
210 future daughter) volumes as well as spatially resolved marker concentrations. We defined the G<sub>1</sub> phase  
211 as the time interval with nuclear Whi5, as in previous studies<sup>34,37</sup>. Because our interest was size control  
212 in G<sub>1</sub>, we subsumed the rest of the cell cycle under G<sub>2</sub>/M, noting that Myo1 marker and bud presence al-  
213 low for a finer discrimination in principle. Corresponding cell cycle annotations as well as the inference  
214 of cell states and rates were automated (see **Methods** and **Fig. S11a** for details).

215 Regarding cell cycle phases, daughter cells (newborn cells with replicative age 0) spent significantly  
216 longer time in G<sub>1</sub> than mother cells (replicative age > 0) and G<sub>1</sub> duration decreased consistently with in-  
217 creasing nutrient availability (**Fig. 6b**) and correspondingly increasing single-cell growth rates (**Fig. S11b**)  
218 as previously reported<sup>41</sup>. Also G<sub>2</sub>/M duration decreased significantly with nutrient availability, albeit  
219 not always between mothers and daughters (**Fig. 6c**). This matches earlier observations with growth  
220 modulation by different carbon sources<sup>40,42,44</sup> and suggests that it is not simply the nutrient type that  
221 sets the G<sub>2</sub>/M duration.

222 Cell volumes at division showed a non-monotonic relation with nutrient availability: for both (future)  
223 mother cells at division (**Fig. 6d**) and their daughters (**Fig. S11d**), cells at the intermediate glucose con-  
224 centration were smallest on average. Increased volumes at low growth rates were not observed in recent  
225 studies focused on Whi5<sup>38,41,42</sup>; we assume this is because they did not cover as long doubling times as  
226 our lowest glucose concentration (on average ≈16h and ≈6h for newborn and older cells, respectively).  
227 Our experiments, however, are consistent with a classical study's results on minimal media<sup>45</sup>. This  
228 non-monotonic relation could explain at most weak linear associations between growth and cell size  
229 observed in yeast populations<sup>46</sup> and it emphasizes the need for single-cell analysis along lineages.

230 Because total Whi5 levels are positively correlated with G<sub>1</sub> duration in different nutrients in a mother-

231 and daughter-specific manner<sup>37,38,41</sup>, we asked if a similar relation exists between cellular Whi5 concen-  
232 tration and cell volume at division. Consistent with previous data<sup>41</sup>, and except for the medium glucose  
233 concentration, these Whi5 levels were significantly higher in daughter than in mother cells (**Fig. 6e**).  
234 However, the most important difference existed between nutrient conditions, suggesting a negative as-  
235 sociation between cell volume and Whi5 levels that is not nutrient-specific (**Fig. 6d,e**, and similar for  
236 nuclear Whi5 in **Fig. S11d**). At the single-cell level, volumes at division and cellular Whi5 concen-  
237 trations at division showed inverse relations that were clearly separated for mother and daughter cells  
238 (**Fig. 6f**). These two distributions, however, merged primarily via daughter cell growth when considered  
239 at Start (**Fig. 6g**), in contrast to the separation between mother and daughter cells when considering the  
240 volumes at division and Start (**Fig. 6h**). Together with the high percentage of variance explained by the  
241 Whi5-volume relations ( $r^2 > 0.4$ ,  $P < 10^{-10}$  in all cases), this indicates that cellular Whi5 could be an  
242 important determinant for the cell size set-point in  $G_1$ .

243 To test this hypothesis, we estimated linear models to predict cell volumes at Start and at the end of  
244 the cycle, using the inverse of the cellular Whi5 concentration at division together with other plausible  
245 variables as predictors (see **Methods**). Both models provided excellent fits to the data (**Fig. 6j-l**). To  
246 predict the volume at Start, the model indicates independent and important effects of the volume and  
247 the Whi5 cellular concentration at the start of  $G_1$  (**Fig. 6j**). Growth in  $G_1$ , cell age and nuclear Whi5  
248 concentration have only minor effects, and factors such as growth in  $G_2/M$  (a negative control) do not  
249 reach significance. We observe a similar pattern for the entire cycle, providing further evidence for the  
250 predictive value of Whi5 concentration for the volume set-point in individual cells.

251 With respect to cell size homeostasis and Whi5's role in it, it was suggested that Whi5 levels memorize  
252 growth rates in earlier cycles, based on population data<sup>38</sup>. For single cells, we do not find such a corre-  
253 lation (**Fig. S11e**), and only weak positive correlations between volume at division and mother or bud  
254 growth rates (**Fig. S11f,g**). Memory of growth rates, in addition would not achieve size homeostasis  
255 because it would represent a positive feedback. Our data suggests that size homeostasis involves a re-  
256 turn to the mean in a stochastic process (**Fig. 6i**); daughters of small mothers tend to have higher Whi5  
257 concentrations than their mothers and thereby a higher volume set-point. The inverse holds for larger-  
258 than-average mothers, leading to a return to the mean size over successive generations. Clearly, we need  
259 additional factors to explain increasing daughter volumes with nutrient availability (**Fig. S11d**) and the  
260 duration of cell cycle phases is less well predicted than cell volumes (**Fig. S11i,j**) without incorporating  
261 activators such as cyclin Cln3<sup>41</sup>.

262 To estimate Whi5 concentrations, we followed previous studies<sup>38,41</sup> by normalizing total cell fluo-  
263 rescence with cell area. Alternatively, one can normalize by cell volume<sup>35</sup>. This concentration es-  
264 timation had only two effects (**Fig. S12**): reducing the impact of cellular Whi5 on cell size predic-  
265 tions (**Fig. S12g**), and not providing evidence for the hypothesis on size homeostasis in the population  
266 (**Fig. S12e**). Hence, quantification methods for protein (Whi5) concentrations require future, detailed  
267 investigations. Overall, however, our multi-dimensional analysis of single-cell behaviors purely in glu-

268 cose media suggests that Whi5 concentration in the cell provides the volume set-point for yeast cells at  
269 Start, with Whi5 distribution along the lineage as a hypothesis for how size homeostasis of the popula-  
270 tion can be achieved.

## 271 Discussion

272 High-quality segmentation and tracking is key for any analysis of microscopy data. However, tracking  
273 is difficult due to different imaging modalities, changing growth environments, and different cell types.  
274 This makes quality control critical, so far by tedious manual curation that does not scale. Cell region  
275 fingerprinting (*CRF*) overcomes this limitation because it reliably discriminates between correctly and  
276 incorrectly assigned cells on consecutive images without ground truth or fine-tuning of parameters.  
277 Importantly, we showed that *CRFs* generalize to different cell types and imaging modalities. Their  
278 major limitations are dealing with fast-changing regions (which can be well-controlled by adequate  
279 imaging frequency) and 'unnecessary' manual curation when false positives occur (but these are a few  
280 percent of all assignments and they do not influence the tracking performance). An avenue for future  
281 development is to extend the *CRF* to higher spatial dimensions.

282 Our tracker *Trac<sup>X</sup>*, which is based on established ideas but includes our new automated *CRF*-based  
283 proofreading concept, underlines both generality and performance of the concept. For example, it is not  
284 trivial that a 'simple' tracker out-competes established algorithms also for very challenging problems,  
285 while additionally flagging suspicious results at the single-cell level. Apart from general limitations  
286 due to inaccurate inputs (primarily bad segmentation results), specific limitations arise again from fast-  
287 changing neighbourhoods. However, the latter can be overcome by good experimental designs to keep  
288 the cells in position, for example, with microfluidic culturing devices or increased imaging frequency.  
289 Highly accurate tracking then also helps to reconstruct the genealogy with high precision for symmet-  
290 rical and asymmetrically dividing cells. Importantly, the modular design of *Trac<sup>X</sup>* makes it a valuable  
291 tool in image analysis pipelines, for example. Because one can choose the-best suited segmentation  
292 algorithm for each cell and division type. Alternatively, the *CRF* classifier can be applied with other  
293 tracking algorithms to subset or manually curate tracking data. One could, for example, thus efficiently  
294 create training sets for neural networks or increase the statistical power in biological applications.

295 Finally, *Trac<sup>X</sup>*'s capabilities enabled us to revisit the classic question how yeast cells control their size  
296 depending on nutrient availability. Its output at the single-cell (lineage) level highlights complex re-  
297 lationships between nutrient availability, replicative age, cell cycle progression, and cell size control,  
298 Specifically, the proposed model for Whi5-mediated control of cell size in single cells and at the popula-  
299 tion level may reconcile largely contradictory findings (or their interpretation based on few parameters)  
300 in previous studies. Evidently, future analyses are needed, for example, to assess in detail if dilution of  
301 Whi5 is central to size control<sup>35</sup> or not<sup>36,39</sup>, and to what extent different methods of protein concentration  
302 estimation impact such conclusions. Such analyses will also need to include activators such as Cln3,

303 the counterparts of Whi5 and related inhibitors<sup>37</sup>. Overall, we argue that our application to cell cycle  
304 control of *S. cerevisiae* shows the need for better, more accurate analysis methods for live-cell imaging,  
305 such as achieved with *Trac*<sup>X</sup>. We are confident that the possibility for mostly automated single-cell anal-  
306 ysis along lineages at large scale will allow further biological insights well beyond similar, cell cycle  
307 related questions.



## 308 **Methods**

### 309 **General notations**

310 We define a time-lapse microscopy dataset as an ordered set of  $T$  images (or image frames) indexed by  
311  $t = 1 \dots T$ . An image contains a set  $\mathcal{S}_t = \{s_{t,1}, \dots, s_{t,n_t}\}$  of segmented objects (in our case, cells, which  
312 we use interchangeably). Note that different images can have different numbers  $n_t$  of such objects.  
313 We denote by  $\mathcal{S} = \bigcup_t \mathcal{S}_t$  the set of all segmented objects over all images. Finally, we define the cell  
314 neighborhood of a segmented object  $s_{t,i}$  in the same image frame  $t$  as the set  $\mathcal{N}(s_{t,i}) \subset \mathcal{S}_t$  of objects  
315 adjacent to  $s_{t,i}$ . Adjacent objects are those objects directly surrounding  $s_{t,i}$  in a fixed perimeter, which  
316 is a user-adjustable parameter.

### 317 **Object features**

318 For each segmented object, various features such as the object centroid position, the object's area cov-  
319 ered and orientation in the image, and potentially quantified signals from additional channels (for exam-  
320 ple, fluorescence) are used. Internally we use the features defined by CellX<sup>21</sup> as well as newly defined  
321 features for symmetrical lineage reconstruction (coordinates and ages of cell poles, cell orientation, and  
322 cell major axis). All segmentation masks from other algorithms are converted into this format prior to  
323 tracking.

### 324 **Cell region fingerprint and fingerprint distance**

325 The cell region fingerprint (CRF) is calculated as the precise descriptor of the local image information  
326 around a segmented object's centroid position on a given image. We apply a cell region fingerprint  
327 window with constant side length ( $f_l$ ; see **Table S1** for all methods parameters) to extract a squared  
328 subset image matrix from the raw image. It is resized by a constant factor ( $f_r$ ). The resulting matrix is  
329 Fourier transformed using the discrete cosine transformation (DCT). From the DCT transformed matrix,  
330 the coefficients for the  $f_q$  lowest frequencies (DCT coefficients) form the CRF denoted by  $f(s_{t,i})$ , where  
331 we set the direct current (DC) coefficient at (0,0) to zero due to its high intensity compared to the  
332 remaining frequencies. Hence,  $f(s_{t,i})$  is a  $f_q \times f_q$  matrix.

333 We measure the similarity of two objects (and their associated regions) by the cell region fingerprint  
334 distance  $d_f : \mathcal{S} \times \mathcal{S} \rightarrow \mathbb{R}$ . It is defined as the normalized Euclidean distance of the objects' CRFs. For  
335 a pair of objects  $(i, j)$  in consecutive frames:

$$d_f(s_{t,i}, s_{t+1,j}) = \frac{\|f(s_{t,i}) - f(s_{t+1,j})\|_F}{\|f(s_{t,i})\|_F^2}, \quad (1)$$

336 where  $\|M\|_F$  denotes the Frobenius norm of matrix  $M$  with elements  $m_{kl}$ ,  $\|M\|_F := \sqrt{\sum_k \sum_l |m_{kl}|^2}$ .

### 337 Neighborhood fraction

338 Our criterion for the classification of cell-to-track assignments is based on the fraction of objects in the  
 339 neighborhood of  $s_{t+1,j}$  that have a lower cell region fingerprint distance to the assigned object in the  
 340 previous frame,  $s_{t,i}$ , than  $s_{t+1,j}$  itself. Formally, with the subset of neighborhood objects and of their  
 341 subset with lower  $d_f$  specified as:

$$S' := \{s_{t+1,k} \in \mathcal{N}(s_{t+1,j})\}, S'' := \{s_{t+1,l} \in S', d_f(s_{t,i}, s_{t+1,l}) < d_f(s_{t,i}, s_{t+1,j})\}, \quad (2)$$

342 this neighborhood fraction is:

$$F_f(s_{t,i}, s_{t+1,j}) = \begin{cases} |S''|/|S'| & \text{if } S' \neq \emptyset \\ 0 & \text{otherwise.} \end{cases} \quad (3)$$

343 We classify assignments using a constant threshold  $\tau_f$ , where  $F_f \geq \tau_f$  indicates an incorrect assignment.

### 344 Initial cell-to-track assignment

345 We obtain initial cell-to-track assignments by solving a linear assignment problem (LAP) with the  
 346 Jonker-Volgenant algorithm that minimizes the total assignment cost<sup>24</sup>. For frame  $t > 1$ , assignments  
 347 are made between two sets of objects: cells in the previous frame together with previously unassigned  
 348 cells, denoted by  $S^S = S_{t-1} \cup S^O$  with elements  $s_i^S$ , and cells in the current frame, denoted by  $S^T = S_t$   
 349 with elements  $s_j^T$ . The set  $S^O$  is initialized to be empty and changes during iterations by adding unas-  
 350 signed cells and removing elements according to the number of frames a cell remained unassigned (see  
 351 below). To account for frame skipping, we define  $\sigma(s)$  for a cell  $s$  as the difference between the current  
 352 frame  $t$  and the last frame with assignment.

The elements of the  $|S^S| \times |S^T|$  total cost matrix  $C$  result from contributions accounting for cell dis-  
 placement, cell size deviations, cell rotations, and frame skipping. Because only subsets of the contri-  
 butions may apply for an assignment problem, we use the general formulation:

$$C_{i,j} = \frac{p}{|C|} \sum_{k \in C} C_{i,j}^k,$$

353 where  $C$  is the set of partial cost functions. The normalization makes costs comparable with different  
 354 numbers of active partial costs, and the proportionality constant  $p$  is adjusted for numerical efficiency  
 355 in solving the LAP (typically, we adjust  $p$  to obtain comparable maximal partial cost function values).

356 To compute the cost for cell displacement, let the vector-valued function  $\mathbf{x}(s)$  be the centroid positions  
 357 of a cell considered for assignment (**Fig. S5a,b**). We predict movement of cell  $s_i^S$  from the last preceding  
 358 frames with assignment (e.g.,  $t - 2$  and  $t - 1$ ), assuming that it is conserved; the vector function  $\delta(s)$   
 359 denotes the estimated displacement filtered by the neighborhood  $\mathcal{N}(s)$ . We use a simple Gaussian filter  
 360 with a custom radius (default value 100 for x and y) to down-weight displacements of distant neighbours.  
 361 The displacement cost matrix is then defined as:

$$C_{i,j}^{\text{disp}} = \frac{1}{\delta_{\max}^2} \cdot \frac{\bar{A}}{\bar{A} + \sqrt{\|\delta(s_i^S)\|_2}} \cdot \|\mathbf{x}(s_i^S) + \delta(s_i^S) \cdot \sigma(s_i^S) - \mathbf{x}(s_j^T)\|_2 \quad (4)$$

362 With the first term, centroid displacements are weighted symmetrically such that a unit cost is reached  
 363 at the maximum allowed displacement  $\delta_{\max}$  (**Fig. S5B**). This parameter has a physical interpretation: it  
 364 is the distance (in pixels) a cell centroid may move under normal growth between consecutive frames.  
 365 This depends on cell type and acquisition system (e.g., magnification and pixel size). The second term  
 366 relates the displacement to the average cell area,  $\bar{A} = \frac{1}{2} (A(s_i^S) + A(s_j^T))$ , where  $A(s)$  gives the area of  
 367 object  $s$ . The last term accounts for the distance between predicted and actual position of  $s_i^S$  in frame  $t$ .

368 A second cost matrix captures changes in cell size, where cell size deviation is weighted asymmetrically  
 369 to account for balanced growth (**Fig. S5c**). The underlying assumption is that a young cell increases  
 370 its size rapidly, whereas loss in size is often due to mis-segmentation in a crowded region. However,  
 371 we allow for enough flexibility to reflect situations where a cell's size might change due to environ-  
 372 mental perturbations such as salt stress. With the cell area ratio  $\rho_A = A(s_j^T)/A(s_i^S)$  and the asymmetric  
 373 expansion functions

$$E_N(\rho_A) = \begin{cases} (\rho_{\text{dec}} - (1 + \rho_\mu)) \cdot ((\rho_{\text{inc}} - (1 + \rho_\mu)) \cdot \rho_A - (1 + \rho_\mu))^{-1} & \text{if } \rho_A > (1 + \rho_\mu) \\ \rho_A - (1 + \rho_\mu) & \text{otherwise} \end{cases} \quad (5)$$

374 and

$$E_D(\rho_A) = \begin{cases} \rho_{\text{dec}} \cdot \rho_\mu & \text{if } \rho_{\text{dec}} \leq (1 + \rho_\mu) \\ \rho_{\text{dec}} \cdot (1 + \rho_\mu) & \text{otherwise} \end{cases}, \quad (6)$$

375 the cell size cost matrix is:

$$C_{i,j}^{\text{size}} = \frac{E_N(\rho_A)^2}{E_D(\rho_A)^2}, \quad (7)$$

376 where the denominator adjust the costs around the growth rate. It uses parameters for maximal allowed  
 377 relative size decrease ( $\rho_{\text{dec}}$ ) and increase ( $\rho_{\text{inc}}$ ) as well as an offset accounting for balanced growth ( $\rho_\mu$ ;  
 378 see **Fig. S5c**).

379 A cost matrix that takes cell rotation into account can help tracking cell types with non-convex shapes.

380 We denote by  $\theta(s)$  the orientation of cell  $s$  (in degrees). With the rotation cost matrix

$$C_{i,j}^{\text{rot}} = \frac{\sin\left(\frac{\pi}{180} \cdot \left[\theta(s_i^S) - \theta(s_j^T)\right]\right)^2}{\sin\left(\frac{\pi}{180} \cdot \theta_{\max}\right)^2} \quad (8)$$

381 the rotation cost is symmetric and defined such that the maximum allowed rotation angle ( $\theta_{\max}$ ) of the  
382 cell's major axis on consecutive frames is where the cost reaches unity (see **Fig. S5d**).

383 Finally, the cost matrix for frame skipping is defined as:

$$C_{i,j}^{\text{skip}} = \frac{\sigma(s_i^S) - 1}{\sigma_{\max}}, \quad (9)$$

384 where  $\sigma_{\max}$  is the maximum tolerated number of frames with a cell not being present (i.e., not segmented,  
385 see **Fig. S5e**).

386 As stated above, the final cost matrix is the sum of the individual weighted cost matrices and reflects  
387 the physical differences of cells between consecutive frames (see **Fig. S5f** for an example).

388 We also implemented a minimal version of the  $Trac^X$  termed  $Trac_{CRF}^X$ . The aim of this tracker is to  
389 track only based on the  $CRF$ : the cost matrix uses only the cell region fingerprint distances between  
390 consecutive frames.

### 391 Assignment validation and refinement

392 After solving the LAP using the above cost matrix, we get the best possible assignment for most of the  
393 cells. As a first independent proofreading step, we validate assignments by a neighborhood fraction  
394  $F_f$  (Eq. 3) below the threshold  $\tau_f$ . Valid assignments are kept and invalid assignments are deleted for  
395 re-evaluation.

396 We refine assignments by first estimating the vector field of cell motions from validated assignments  
397 and then correcting or adding assignments iteratively by solving LAPs<sup>26</sup> (see **Fig. S6**). During two  
398 refinement iterations, we first use Eq. 4 with its quadratic penalty, then we replace the displacement  
399 cost matrix by:

$$C_{i,j}^{\text{ref}} = \frac{1}{\delta_{\max}^2} \cdot \frac{\bar{A}}{\bar{A} + \sqrt{\|\hat{\delta}(s_i^S)\|_2}} \cdot \|\mathbf{x}(s_i^S) + \hat{\delta}(s_i^S) \cdot \sigma(s_i^S) - \mathbf{x}(s_j^T)\|_1. \quad (10)$$

400 It allows for linear motion up to a defined distance (see **Table S1**) and uses the estimated vector field  
401  $\hat{\delta}(s)$ . Next, we again use a modified Eq. 4 with a linear penalty to allow displacement only along the  
402 vectors.

403 Finally, we update the set of cells considered for future assignments with the set of unassigned cells  
404 up to frame  $t$ ,  $S^U$ , but remove cells that exceed the threshold  $\sigma_{max}$  for frame skipping, that is,  $S^O \leftarrow$   
405  $S^U (\sigma(s^U) \leq \sigma_{max})$ .

## 406 Lineage reconstruction

407 To determine the parent of each symmetrically dividing cell with rod-shaped phenotype, we calculate  
408 the cell pole coordinates  $Po_{1,2}$  from the cell's centroid  $s_{x,y}$ , major axis length  $l_{ma}$  and orientation  $\theta$  via:

$$Po_1 = \begin{pmatrix} s_x + \delta_x \\ s_y + \delta_y \end{pmatrix}, Po_2 = \begin{pmatrix} s_x - \delta_x \\ s_y - \delta_y \end{pmatrix}, \delta_x = \frac{l_{ma}}{2} \cdot \cos(\theta), \delta_y = \begin{cases} \frac{l_{ma}}{2} \cdot \sin(\theta) & \text{if } \theta > 0 \\ -\frac{l_{ma}}{2} \cdot \sin(\theta) & \text{if } \theta \leq 0 \end{cases}. \quad (11)$$

409 We then minimize the Euclidean distance between poles of newly starting tracks and the cell centroid  
410 of tracks ending in the previous frame within reasonable distance (defined by the parent cell length)  
411 and overlap with the parent track. This directly establishes the parent relationship for newborn tracks  
412 as well as the cell pole ages (poles with minimal distance are set to zero, their opposites increase age by  
413 one). Cell pole ages in the first frame are undefined.

414 To determine the parent of each track for symmetrically dividing cells with amorphous or convex phe-  
415 notype, we assume that a cell division of one ending parent track leads to the beginning of two new  
416 daughter tracks. Because this might not always apply (e.g., if a track is a continuation of a parent track  
417 with one daughter cell) *Trac<sup>X</sup>* tries to detect cases with strong size decrease. Possible daughter candi-  
418 dates are evaluated iteratively, while infeasible ones (spatial distance above a threshold or both daughters  
419 in a continuous track) are excluded on consecutive frames with an infinite cost. Assignments are made  
420 by solving the linear assignment problem with the LAPV. The solution can contain the same daughter  
421 in more than one daughter-parent assignment. To resolve that, each daughter is assigned to only its  
422 closest assigned parent. However this might break daughter pairs, now lacking a daughter. Finally, the  
423 daughter parent assignments are set by setting the parent for each daughter. Wrong continuous tracks  
424 are now marked for splitting and single daughter parent pairs are marked for joining. See flowchart in  
425 **Fig. 5i** for details.

426 To automate the bud (daughter) to mother assignment for asymmetrically dividing cells with a fluores-  
427 cent bud neck marker, we segment the marker by first de-noising the raw images with a total variation  
428 regularization filter (termed after the authors, ROF)<sup>47</sup>. Remaining speckles are removed by median  
429 filtering with a 3x3 kernel. We then compute the differential of Gaussian (DoG) with a rotationally  
430 symmetric Gaussian lowpass filter of equal size (21px) with standard deviations  $\sigma = [1, 2]$ . The result-  
431 ing image is filtered by a canny edge filter with a user-definable parameter (edge sensitivity threshold;  
432 see **Fig. S3**) to detect the contours of the rod-shaped bud neck signal. We fill the holes in contours and  
433 dilate the image with a disk of 1px size to remove pixel fragment noise, followed by another round of

434 morphological dilation and erosion. We then mask with the cell segmentation mask to set the signal  
435 outside single cells and colonies to zero. The resulting image is converted into a labeled mask. We  
436 keep bud necks within a specified area range and track them with the same algorithm as the cells, but  
437 with independently adjustable parameters. Daughter-parent assignments are performed iteratively on  
438 consecutive frames by optimizing bud neck overlaps with exactly two cell masks until convergence. The  
439 corresponding two tracks form a daughter-parent candidate if we also detect the bud neck signal inde-  
440 pendently on a line profile between the centroids of daughter and parent. Finally, we compute the most  
441 likely daughter parent pair as the one with the highest occurrence probability throughout its detection  
442 in experiment.

## 443 **Implementation**

444 We implemented *Trac<sup>X</sup>* in Matlab (MathWorks, Natick, MA) with a modular design, a command line  
445 interface (CLI), and a simple graphical user interface (GUI). Key features are: (i) *Trac<sup>X</sup>* requires segmen-  
446 tation results in the format established by CellX; a module provides format conversions. (ii) One can test  
447 and modify default parameters on a subset of the data before batch processing. (iii) *Trac<sup>X</sup>* provides tools  
448 to detect, visualize, and exclude segmentation artefacts such as cell debris and constrain input data by  
449 defining regions of interest, image border offsets, and thresholds on any segmentation feature, including  
450 fluorescence. (v) Tracking results are saved in tabular form, as control images for each frame to inspect  
451 the results, and as *Trac<sup>X</sup>* state to resume work later. (vi) Image processing and visualization modules en-  
452 able display and export of, for example, animated movies and genealogy. (vi) The modular design allows  
453 to extend *Trac<sup>X</sup>* as well as its use in larger workflows (*Trac<sup>X</sup>* saves project details as machine-readable  
454 XML files). For details, see **Supplementary Text**, methods parameters in **Table S1**, algorithm descrip-  
455 tions in **Figs. S7–S8**, and the user documentation at <https://tracx.readthedocs.io/en/latest/>.

## 456 **Performance evaluation**

457 Performance evaluations focused on our *CRF* method’s ability to detect incorrect assignments in track-  
458 ing. We therefore classify assignments between objects in consecutive frames as positive (predicted  
459 incorrect) if  $F_f > \tau_f$ , and negative (predicted correct) otherwise. To measure accuracy of the binary  
460 classification with respect to the ground truth (manual tracking), we use the balanced F-score ( $F_1$ ), the  
461 harmonic mean of precision and recall:

$$\text{F-score} = \frac{TP}{TP + \frac{1}{2}(FP + FN)},$$

462 with true positives ( $TP$ ), false positives ( $FP$ ), and false negatives ( $FN$ ).

463 To evaluate parameter influences on classifier performance, we determined F-scores for all combinations  
464 of window side length  $f_l \in [20, 30, 40, 50, 60, 80, 100, 120, 150, 200, 300]$  (px), re-size factor  $f_r \in [20,$



465 25, 32, 40, 50, 64, 80, 121, 150, 200, 300] (px), and number of DCT coefficients  $f_q \in [2, 4, 8, 10, 12,$   
466 16, 20, 25, 30, 35, 40] (-). We used the following imaging data sets (see **Table S2**): 60mrnaCropped<sup>48</sup>,  
467 TS-SC9 (brightfield and fluorescence), and Fluo-N2DH-GOWT1<sup>33</sup>.

468 To assess *Trac*<sup>X</sup> performance, we used the yeast imaging tool-kit (YIT)<sup>11</sup> datasets summarized in **Ta-**  
469 **ble S2**. These ten datasets pose various challenges for cell tracking such as small colonies (YIT-TS1,  
470 2, 6), colony translations and merging (YIT-TS3), and large colonies growing out of the field of view  
471 (YIT-TS4, 5, 7)<sup>11</sup>. We included three recent transmission light and phase contrast data sets that contain  
472 dense colonies and cells with irregular morphology (YIT-TS7-10)<sup>11, 30</sup>. To obtain the missing segmen-  
473 tation masks, we re-segmented using CellX<sup>22</sup>, CellStar<sup>11</sup> or YeaZ<sup>49</sup> and then benchmarked *Trac*<sup>X</sup> with  
474 the manually curated ground truth from YIT and their published evaluation platform (EP).

## 475 **Strains and cultivation**

476 We used *S. cerevisiae* strains FRY2795 (a prototrophic haploid derivative of FY4 of genotype MAT $\alpha$   
477 bearing Myo1-mKate (3x) and Whi5-mKOK (1x) modifications inserted using an unpublished CRISPR  
478 protocol) and FRY2031 (an unmodified haploid prototrophic strain, FY4 of genotype MAT $\alpha$ ). Details  
479 are given in **Tables S3-S5**. Cells were cultured in synthetic minimal media (SDmin) unless stated oth-  
480 erwise. We used 1.7 g l<sup>-1</sup> yeast nitrogen base (BD Biosciences, Germany), without amino acids or  
481 ammonium sulfate, 5 g l<sup>-1</sup> ammonium sulfate (Sigma-Aldrich Co., Germany), and 20 g l<sup>-1</sup> D-glucose  
482 (Sigma-Aldrich Co., Germany) for the 100mM (2%) D-glucose condition. For the other media condi-  
483 tions with 0.2 mM (0.004%) and 0.05 mM (0.001%) D-Glucose, the liquid D-glucose stock was serially  
484 diluted for higher precision. Prior to imaging, cells were streaked on YPD plates at room temperature  
485 directly from the freezer. Single colonies were picked and diluted into the respective liquid media at  
486 30°C in an orbital shaker days before the actual experiment. Using a Z2 Coulter Counter (Beckman  
487 Coulter, Nyon, Switzerland) and custom software, the liquid cultures were diluted to a cell density of  
488  $3 - 5 \cdot 10^6$  cells per ml before loading them onto the microfluidic device (CellClamper<sup>50</sup>).

## 489 **Imaging and image analysis**

490 In all experiments, we loaded the first two chambers with FRY2795 and the last two chambers with  
491 FRY2031, serving as growth control and to estimate background fluorescence. 3  $\mu$ l of cell suspen-  
492 sion were loaded into each chamber of the microfluidic device before covering it with a glass slide  
493 and connecting it to the media perfusion pumps. Pads of various sizes with at least one seeding cell  
494 were selected for imaging. During imaging, the respective medium was perfused with a flow rate of  
495 15  $\mu$ l/min by a Nemesys pump (Cetoni GmbH, Germany). A custom climate chamber around the Nikon  
496 Ti-E inverted microscope (Nikon Europe B.V., Amsterdam, Egg, Switzerland) kept the environment at  
497 constant 30° C. Medium reservoir and pumps inside the chamber kept the media at the same temper-  
498 ature. We equipped the microscope with a Nikon CFI Super Fluor 40X Oil, 1.3NA objective (Nikon

499 Europe B.V., Amsterdam, Egg, Switzerland) and SpectraX light engine (Lumencore Inc., USA) light  
500 source. To excite the fluorophores, we assembled the following filter cubes: #1 EX: 600/14nm, BS:  
501 STHC 624nm, EM 655/40nm for mKate2 and #2 Ex: 546/6nm BS: ST565nm EM: 577/25nm for mKO $\kappa$   
502 (AHF Analysetechnik, Tuebingen, Germany). The imaging interval was chosen such that cells do not  
503 suffer photomorbidity<sup>51</sup> based on the expected average cell cycle time (5, 12, and 10 min for 100, 0.2  
504 and 005mM D-glucose). Microscope and peripherals were controlled by YouScope<sup>52</sup>. We performed  
505 at least two independent experiments per glucose concentration.

506 We used CellX<sup>22</sup> for signal quantification and cell segmentation. For each experiment, a matching  
507 parameter file was tested on a few images to ensure best segmentation before batch analysis jobs were  
508 submitted using a custom job scheduler to a multi core machine (Power Edge T20 with Intel Xenon  
509 2.1Ghz, 96 cores, 200 GB Ram, Dell Inc, USA). Segmented cells were tracked and assigned to a lineage  
510 using *Trac*<sup>X</sup>. Further analysis was performed with custom scripts in MATLAB (Mathworks Inc, USA).

### 511 Cell cycle analysis

512 Per experimental condition (glucose concentration), we corrected CellX output for background fluores-  
513 cence first by pixel-wise subtraction of the average fluorescence outside segmented cells and then by  
514 volume correction based on the control strain's fluorescence. For the latter, we used a polynomial inter-  
515 polant over all control cells. Concentrations of Whi5 in the respective cellular compartment (entire cell  
516 or nucleus) were then calculated as the total corrected fluorescence divided either by the compartment's  
517 area or by its estimated volume. Volume growth rates were estimated for G<sub>1</sub> and G<sub>2</sub>/M separately, using  
518 linear models (exponential models yielded the same estimation quality with our data).

519 To identify the phase of nuclear Whi5 (defined as G<sub>1</sub> here), we derived a Whi5 signal by normalizing  
520 the median nuclear by the median cellular fluorescence to improve the signal-to-noise ratio. Then,  
521 per chamber, we fitted a two-component Gaussian mixture model to the Whi5 signal distribution and  
522 identified a common maximum likelihood threshold for classification of all corresponding cells and  
523 time points (see **(Fig. S11a)** for an example). For the identification of budding and cell division events,  
524 we used the segmentation and Myo1 data as described above, except when Myo1 at the bud neck could  
525 not be detected (in that case, the start of Whi5 nuclear localization was used). Volume outliers were  
526 detected via the 1% quantile of cell volume differences between time points and discarded. Finally, we  
527 retained only complete cycles (showing the sequence cell division, G<sub>1</sub>, Start, budding, and subsequent  
528 division) and complete G<sub>1</sub> phases (showing the sequence up to Start) for further analysis.

529 To test for significant differences between groups, unpaired two-sided t-tests for means were used with-  
530 out correction for multiple testing; we considered comparisons between conditions only significant  
531 when all individual group tests were significant at  $\alpha = 0.05$ . For one-dimensional regressions, linear  
532 ( $y = b_0 + b_1 \cdot x + \epsilon$ ) and inverse linear ( $y = b_0 + b_1 \cdot x^{-1} + \epsilon$ ) models were used. For multidimensional  
533 models, we used robust linear regression (Matlab function `fitlm`) after discretizing the cell age into

534 newborn and old (replicative age = 0 and > 0, respectively). For predictor variable selection, phase  
535 durations were not included because they directly depend on growth rates and volumes when a size  
536 set-point is assumed. For all regressions, unadjusted coefficients of determination ( $r^2$ ) are reported.

## 537 **Acknowledgements**

538 We thank Markus Dürr for initial implementation of Ricicova' tracker in R and Urs Küchler for its  
539 translation to Matlab. We thank Gregor Schmidt for training of the CellClamper and sharing datasets.

## 540 **Author contributions**

541 **A.P.C.**, **F.R.** and **J.S.** conceptualized the project. **A.P.C.** developed the CRF and wrote the TracX  
542 software. **A.P.** wrote the Gaussian vector filtering. **T.K.** initiated and co-developed the graphical user  
543 interface and wrote the amorphous cell lineage reconstruction. **A.P.C.** engineered the cell strains and  
544 performed the microscopy experiments. **A.P.C.** and **J.S.** validated the software and analysed the data.  
545 **A.P.C.** and **J.S.** wrote the manuscript. All authors read and approved the final manuscript.

## 546 **Conflict of interest**

547 The authors declare no competing interests.

## 548 **Data availability**

549 The data used in this study as well the analysis scripts are available for download at  
550 <https://polybox.ethz.ch/index.php/s/iw0BUsjNFYIAqaX>.

551 The *Trac<sup>X</sup>* software can be downloaded from <https://gitlab.com/csb.ethz/tracx> as well as demo  
552 data from [https://gitlab.com/csb.ethz/tracx\\_demo\\_data](https://gitlab.com/csb.ethz/tracx_demo_data).

553 **Figures**

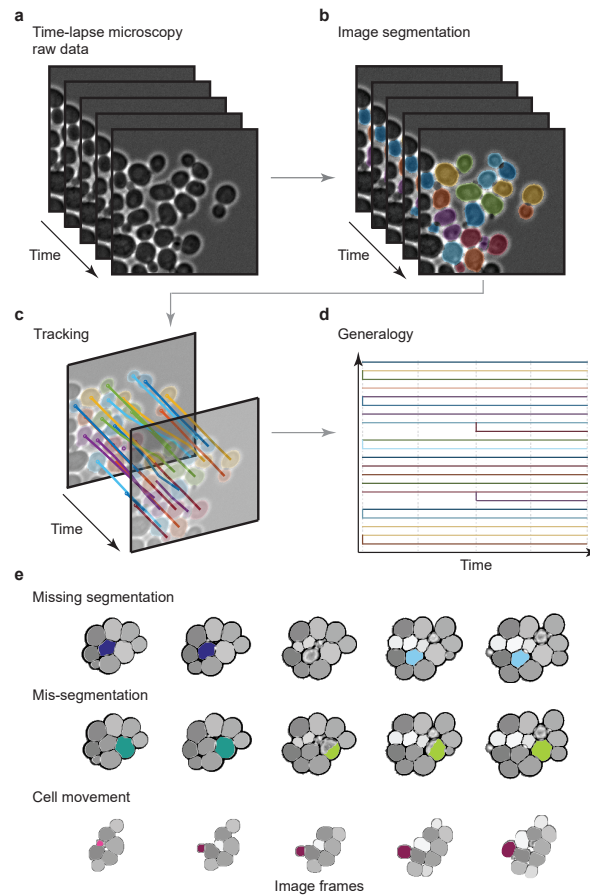

**Figure 1. Cell tracking pipeline and common problems.** **a** Typical time-lapse microscopy dataset: bright field images from various time-points as input. **b** Image segmentation for the detection of cells (colored). **c** Tracking of segmented objects over (consecutive) time-points. **d** Reconstruction of the genealogy. Colors in **b-d** indicate cell identity. **e** Common difficulties during cell tracking over consecutive frames (columns) illustrated by individual cells (colored) and their track associations (colors). First row: Missing segmentation in frame 3 leads to premature track termination in frame 2, resulting in two separate short tracks (frames 1-2 and 4-5) without assignment in frame 3. Second row: Mis-segmentation in frame 3 leads to the restart of a new track in frame 3, resulting in two short tracks (1-2 and 3-5). Third row: Cell displacement due to cell growth or culturing creates artificial track ends (frame 1) and starts (frame 2).

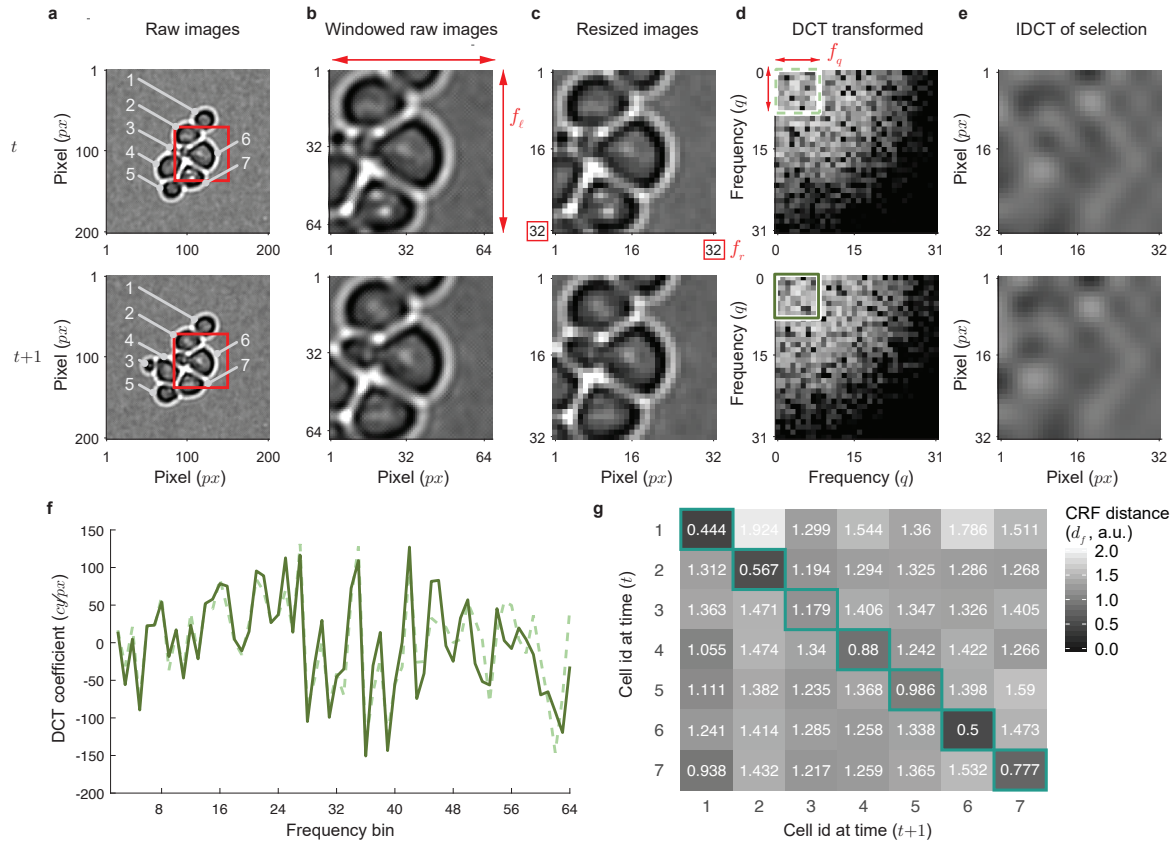

**Figure 2. Cell region fingerprint (CRF).** **a** Raw images of two frames  $t$  and  $t + 1$  of a *S. cerevisiae* cell culture. Numbers: cell identifiers; red squares: cropping regions of approximately twice the cell diameter around the centroid of cell 6. **b** Cropped image regions. **c** Re-sized image crops (32 x 32 pixels). **d** Discrete cosine transformation (DCT) of images in **c**. Green squares: lowest frequencies (8 x 8) used as cell region fingerprint. **e** Inverse DCT (iDCT) of the 8 x 8 frequencies. **f** Superimposed, arrayed 8 x 8 frequencies of the CRF. Solid line: frame  $t$ ; dashed line: frame  $t + 1$ . **g** Cell region fingerprint distance ( $d_f$ ) matrix for all pairs of cells in frames  $t$  and  $t + 1$  from **a**. Green boxes highlight lowest distances between a cell in  $t$  and any cell in  $t + 1$ .

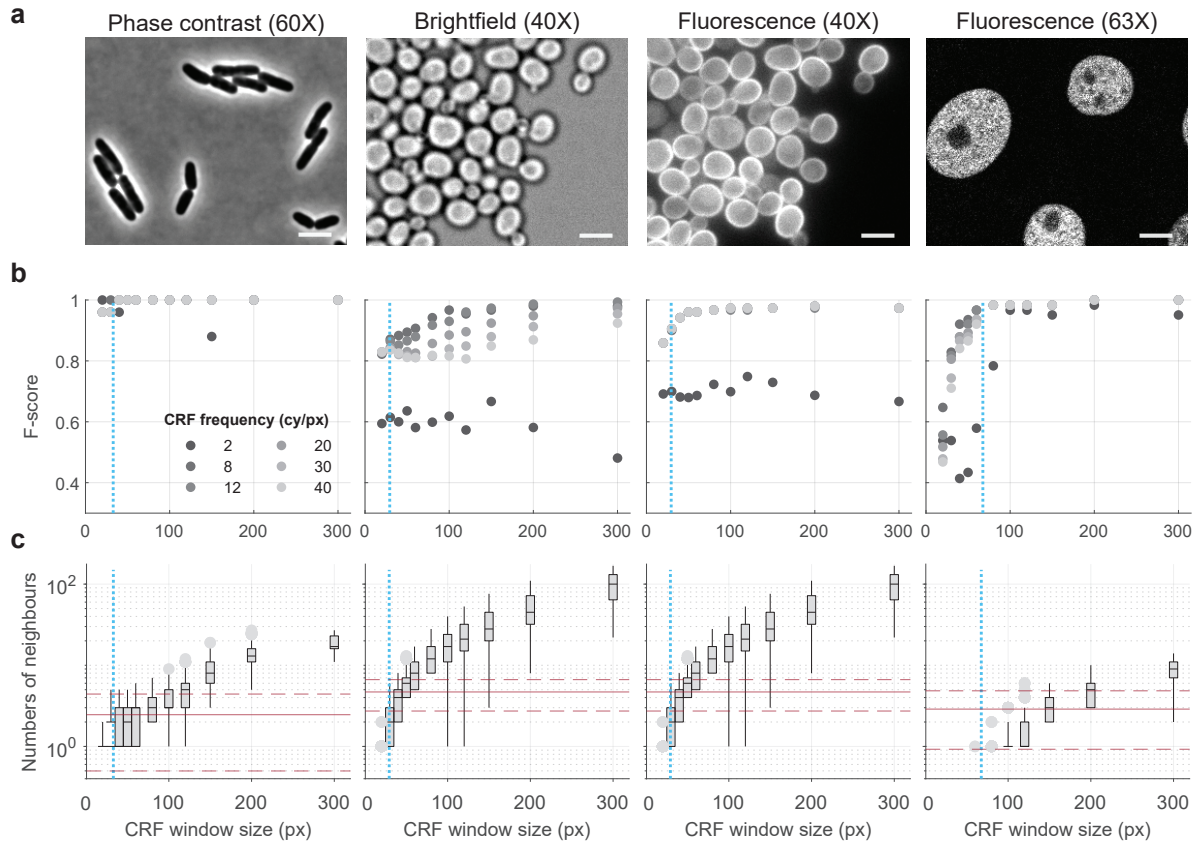

**Figure 3. Cell region fingerprint parameter evaluation for different cell types, image modalities and magnifications.** **a** Example images for bacterial (*E. coli*<sup>48</sup>; left), yeast (*S. cerevisiae*; middle) and mammalian (N2DH-GOWT1 mouse embryonic stem cells;<sup>33</sup> right) cells acquired as indicated. Scale bar: 32 pixels. **b** F-scores depending on CRF window sizes ( $f_l$ ) and CRF frequencies ( $f_q$ ) for a fixed resizing factor ( $f_r = 121$  px or  $4.66 \pm 0.05$  neighbouring cells; the value did not influence the F-score, see **Fig. S1**). Dotted cyan lines: mean cell diameters. **c**. Numbers of neighbour cells depending on window size (Box plots). Numbers of neighbours for computing the fraction ( $F_f$ ) are given as mean (red solid line) and 95% confidence interval (red dashed lines).



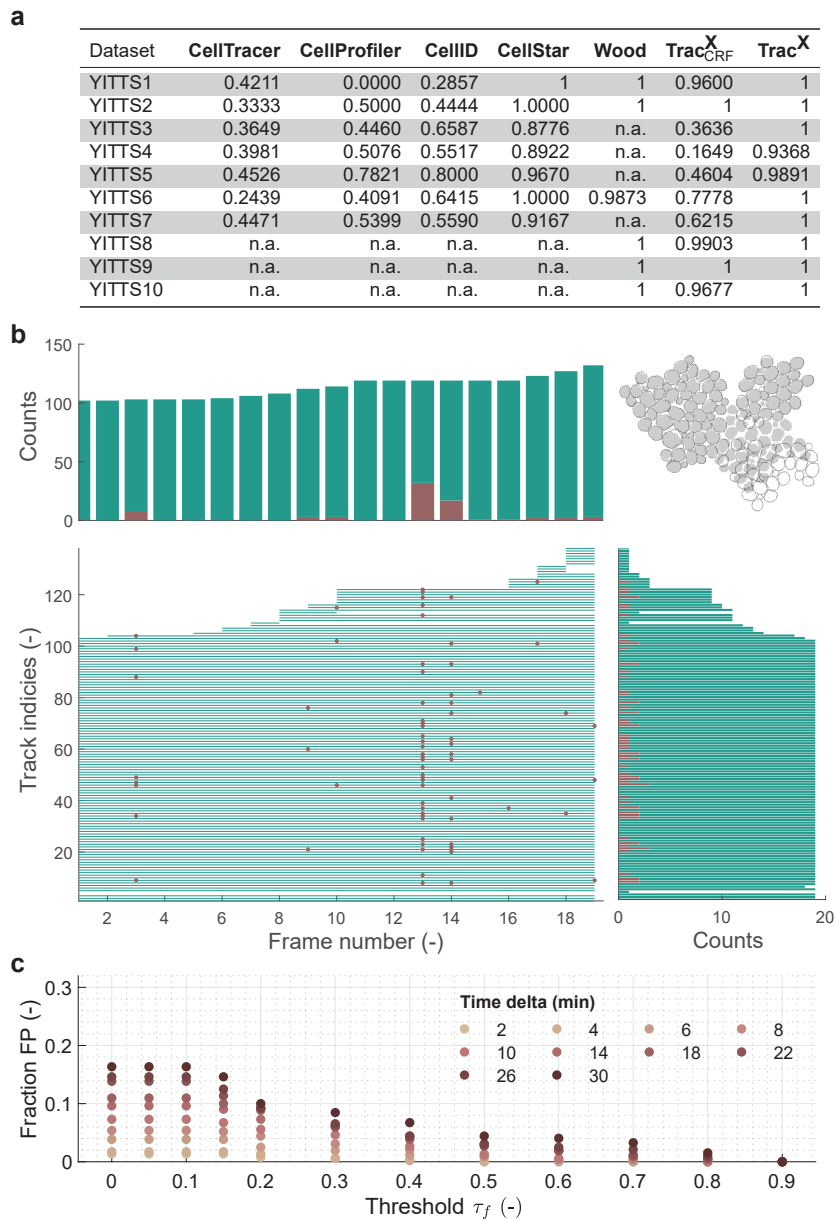

**Figure 4. Performance of  $Trac^X$ .** **a** Performance assessment (long-term tracking quality characterized by the F-score) of  $Trac^X$  based on yeast image toolkit data sets YIT-TS1-10 compared to the five best-performing algorithms<sup>10</sup> on these data. See **Methods** for details. Compared to the final implementation ( $Trac^X$ ),  $Trac_{CRF}^X$  bases assignments only on the fingerprint distance ( $d_f$ ). **b**  $CRF$ -based track assignment score for each cell (track index) over time (image frames) with corresponding counts (top and right histograms) in *S. cerevisiae* data set YIT-TS3. Green lines:  $d_f$  is lowest for the given assignment; red dots: cells with lower  $d_f$  exist, indicating uncertain assignments. Top right: example segmentation masks for the transition from frame 12 (outlines) to frame 13 (filled). **c** Fraction of false positives (FP, assignments identified as questionable despite being correct; here normalized by the total number of assignments) for yeast data set TS-SC9 as a function of neighborhood threshold  $\tau_f$  and imaging frequency.

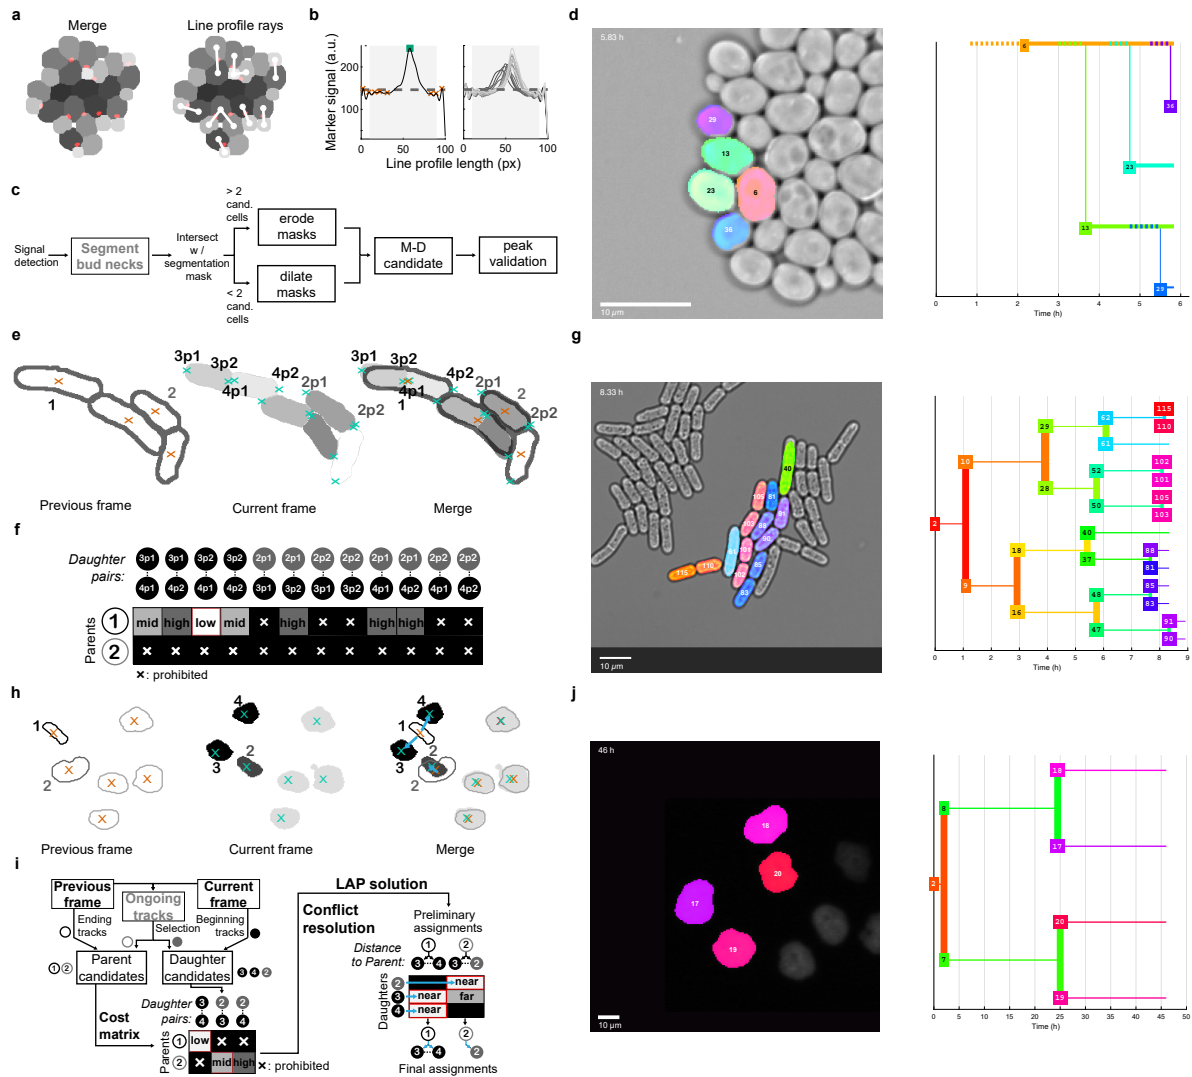

**Figure 5. Genealogy reconstruction.** **a-d** Lineage reconstruction for asymmetrically dividing *S. cerevisiae* cells using the bud neck marker Myo1. **a** Left: merge of segmentation masks for cells (grey) and marker (red). Right: overlay of profile lines (white) between centroids (white dots) of candidate mother-daughter pairs. **b** Left: typical, re-scaled marker signal between two cell centroids along the profile line (black line) with detected peaks (red crosses) and selected peak indicating bud neck marker presence (green square). Boundary regions (no gray background) are ignored. Right: marker signals for all cells in **a**. **c** Flowchart of the reconstruction. For each marker signal, neighbouring cell masks are eroded or dilated up to a single candidate mother-daughter cell pair, which is then validated by marker presence. **d** Cell lineage for a selected mother cell and all its offspring; cell identities (numbers, colors) match between example image and lineage tree. **e-g** Lineage reconstruction for symmetrically dividing, rod-shaped cells such as *S. pombe* using cell centroids and poles. **e** Segmented cells (black outlines and indices) and their centroids (red crosses) of the previous frame are merged with segmentation results of the current frame, including identified poles (cyan crosses; labels 'xpy' specify cell x and pole age y). **f** Schematic cost matrix for the daughter pair - parent assignment based on the distance between pole coordinates of cells in new tracks and centroids of cells in the previous frame. **g** Example lineage tree as in **d**. **h-i** Lineage reconstruction for convex, symmetrically dividing cell types such as N2DL-HeLa cells<sup>33</sup> based on (nuclear) fluorescent label. **h** Similar to **e**, but with consideration of centroids in previous (red crosses) and current (blue crosses) frame. Black: candidate daughter cells. **i** Flowchart for reconstruction, example cost matrix, and assignment results after conflict and linear assignment problem (LAP) solution. **i** Example lineage tree as in **d**. Scale bars: 10  $\mu$ m.

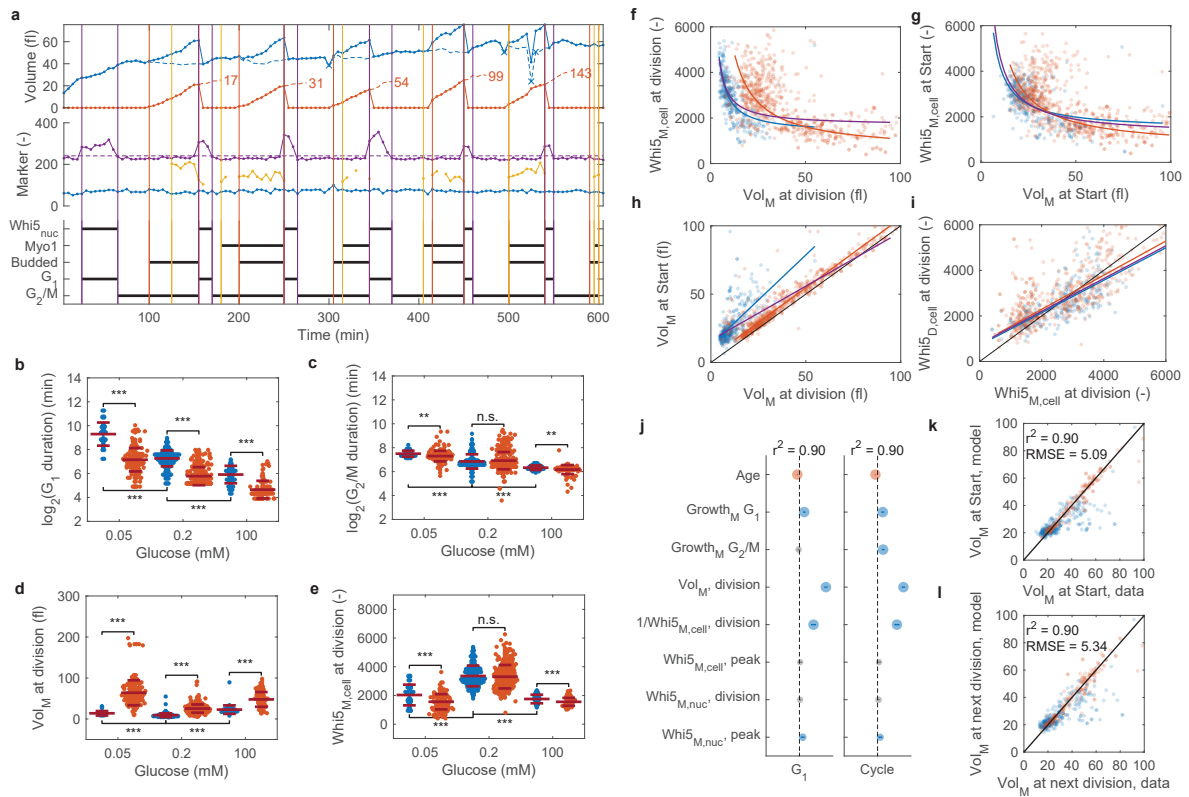

**Figure 6. Effects of glucose availability on cell cycle regulation of *S. cerevisiae*.** **a** Example single-cell track for growth on 100 mM glucose. Volumes: mother including (blue solid) and excluding (blue dashed) bud, bud (red solid), and initial volume dynamics of daughter cells (numbered) after division (red dashed). Markers (arbitrary scaling): Whi5 nuclear concentration normalized by Whi5 cellular concentration (purple), Whi5 cellular concentration (blue) and bud neck marker Myo1 (yellow). Automatically identified phases are indicated by black horizontal lines in the lower panel, and corresponding vertical lines in all panels. Subscript: nuc, nuclear concentration. **b-e** Cell cycle states grouped by newborn (blue) and older (red) cells and glucose concentrations. Purple lines show mean  $\pm$  s.d. Results of unpaired two-sided t-tests: \*,  $P < 0.05$ ; \*\*,  $P < 0.01$ ; \*\*\*,  $P < 0.001$ ; n.s., not significant ( $P > 0.05$ ). From left to right, group sizes for complete cell cycles were  $n = 41/176/189/283/54/84$ , and for additional  $G_1$  phases  $n = 2/22/32/116/1/30$ . **f-i** Correlations of cell cycle variables for newborn (blue) and old (red) cells with data (points) and corresponding regressions (lines; inversely proportional for **f,g** and linear for **h,i**). Purple line: regression for all cells. Subscripts: M, mother; D, daughter; cell, cellular concentration. **j** Effect sizes in linear models for cell size at the end of  $G_1$  (volume at Start) and of the cell cycle (volume at next division). Symbols: significant negative (red), significant positive (blue), and not significant (grey) at  $\alpha = 0.05$ . Sizes are proportional to  $-\log P$  for two-sided t-tests of coefficients. All tested covariates are shown. Vertical bars show 95% confidence intervals of estimates. **k,l** Model predictions vs data for individual newborn (blue) and older (red) cells. Black line: identity. RMSE: root mean squared error.

## 554 References

- 555 1. Luro, S., Potvin-Trottier, L., Okumus, B. & Paulsson, J. Isolating live cells after high-throughput,  
556 long-term, time-lapse microscopy. *Nature methods* **17**, 93–100. ISSN: 1548-7105 (1 Jan. 2020).  
557 ppublish.
- 558 2. Camsund, D. *et al.* Time-resolved imaging-based CRISPRi screening. *Nature methods* **17**, 86–92.  
559 ISSN: 1548-7105 (1 Jan. 2020). ppublish.
- 560 3. Kuchen, E. E., Becker, N. B., Claudino, N. & Höfer, T. Hidden long-range memories of growth and  
561 cycle speed correlate cell cycles in lineage trees. *eLife* **9**. ISSN: 2050-084X (Jan. 2020). epubli.sh.
- 562 4. Loeffler, D. *et al.* Asymmetric lysosome inheritance predicts activation of haematopoietic stem  
563 cells. *Nature* **573**, 426–429. ISSN: 1476-4687 (7774 Sept. 2019). ppublish.
- 564 5. Moen, E. *et al.* Deep learning for cellular image analysis. *Nature methods* **16**, 1233–1246. ISSN:  
565 1548-7105 (12 Dec. 2019). ppublish.
- 566 6. Stringer, C., Wang, T., Michaelos, M. & Pachitariu, M. Cellpose: a generalist algorithm for cellular  
567 segmentation. *Nature methods*. ISSN: 1548-7105 (Dec. 2020). aheadofprint.
- 568 7. Meijering, E. A bird’s-eye view of deep learning in bioimage analysis. *Computational and struc-*  
569 *tural biotechnology journal* **18**, 2312–2325. ISSN: 2001-0370 (2020). epubli.sh.
- 570 8. Han, H. eDetect : A Fast Error Detection and Correction Tool for Live Cell Imaging Data Anal-  
571 ysis eDetect : A Fast Error Detection and Correction Tool for Live Cell Imaging Data Analysis.  
572 *iScience* **13**, 1–8. ISSN: 2589-0042.
- 573 9. Sorokin, D. V. & Matula, P. Cell Tracking Accuracy Measurement Based on Comparison of  
574 Acyclic Oriented Graphs (2015).
- 575 10. Ulman, V. *et al.* An objective comparison of cell-tracking algorithms. *Nature Methods* **14**, 1141–  
576 1152. ISSN: 15487105 (2017).
- 577 11. Versari, C. *et al.* Long-term tracking of budding yeast cells in brightfield microscopy : CellStar  
578 and the Evaluation Platform. *J. R. Soc. Interface*. ISSN: 17425662 (2017).
- 579 12. Hilsenbeck, O. *et al.* Software tools for single-cell tracking and quantification of cellular and  
580 molecular properties. *Nat Biotech* **34**, 703–706. ISSN: 1087-0156. arXiv: arXiv:1011.1669v3  
581 (2016).
- 582 13. Amat, F. *et al.* Fast , accurate reconstruction of cell lineages from large-scale fluorescence mi-  
583 croscopy data. **11** (2014).
- 584 14. Bray, M.-a. & Carpenter, A. E. CellProfiler Tracer : exploring and validating image data. *BMC*  
585 *Bioinformatics*, 1–7 (2015).
- 586 15. Winter, M., Mankowski, W., Wait, E., Temple, S. & Cohen, A. R. LEVER: software tools for  
587 segmentation, tracking and lineaging of proliferating cells. *Bioinformatics* **32**, 3530–3531 (2016).

- 588 16. Lugagne, J.-B., Lin, H. & Dunlop, M. J. DeLTA: Automated cell segmentation, tracking, and lin-  
589 eage reconstruction using deep learning. *PLoS computational biology* **16**, e1007673. ISSN: 1553-  
590 7358 (4 Apr. 2020). epubliish.
- 591 17. Rullan, M., Benzinger, D., Schmidt, G. W., Miliias-Argeitis, A. & Khammash, M. An Optoge-  
592 netic Platform for Real-Time, Single-Cell Interrogation of Stochastic Transcriptional Regulation.  
593 *Molecular cell* **70**, 745–756.e6. ISSN: 1097-4164 (4 May 2018). ppublish.
- 594 18. Cox, I. J., Kilian, J., Leighton, F. T. & Shamoan, T. Secure spread spectrum watermarking for  
595 multimedia. *IEEE Transactions on Image Processing* **6**, 1673–1687. ISSN: 10577149 (1997).
- 596 19. Izumi Ito, H. K. DCT Sign-Only Correlation with Application to Image Matching and the Rela-  
597 tionship with Phase-Only Correlation. *2007 IEEE International Conference on Acoustics, Speech*  
598 *and Signal Processing - ICASSP '07*, 1237–1240 (2007).
- 599 20. Fei, M., Ju, Z., Zhen, X. & Li, J. Real-time visual tracking based on improved perceptual hashing.  
600 *Multimedia Tools and Applications* **76**, 4617–4634. ISSN: 15737721 (2017).
- 601 21. Mayer, C., Dimopoulos, S., Rudolf, F. & Stelling, J. Using cellX to quantify intracellular events.  
602 *Current Protocols in Molecular Biology* **Chapter 14**, Unit 14.22. ISSN: 1934-3647 (2013).
- 603 22. Dimopoulos, S., Mayer, C. E., Rudolf, F. & Stelling, J. Accurate cell segmentation in microscopy  
604 images using membrane patterns. *Bioinformatics* **30**, 2644–2651 (2014).
- 605 23. Ricicova, M. *et al.* Dissecting genealogy and cell cycle as sources of cell-to-cell variability in  
606 MAPK signaling using high-throughput lineage tracking. *Proceedings of the National Academy*  
607 *of Sciences of the United States of America* **110**, 11403–8. ISSN: 1091-6490 (2013).
- 608 24. Jonker, R. & Volgenant, A. A shortest augmenting path algorithm for dense and sparse linear  
609 assignment problems. *Computing* **38**, 325–340. ISSN: 0010485X (1987).
- 610 25. Kuhn W. H. The hungarian method for the assignment problem. *Naval Research Logistic Quar-*  
611 *terly*, 83–97 (1955).
- 612 26. Delgado-Gonzalo, R., Nicolas, D, Maerkl, S. & Unser, M. Multi-target tracking of packed yeast  
613 cells. *IEEE*, 544–547 (2010).
- 614 27. Wang, Q., Niemi, J., Tan, C. M., You, L. & West, M. Image segmentation and dynamic lineage  
615 analysis in single-cell fluorescence microscopy. *Cytometry Part A* **77**, 101–110. ISSN: 15524922  
616 (2010).
- 617 28. Carpenter, A. E. *et al.* CellProfiler: Image analysis software for identifying and quantifying cell  
618 phenotypes. *Genome Biology* **7**. ISSN: 14747596 (2006).
- 619 29. Gordon, A. *et al.* Single-cell quantification of molecules and rates using open-source microscope-  
620 based cytometry. *Nature Methods* **4**, 175–181. ISSN: 15487091 (2007).
- 621 30. Ezgi Wood, N. & Doncic, A. A fully-automated, robust, and versatile algorithm for long-term  
622 budding yeast segmentation and tracking. *PLoS ONE* **14**, 1–28. ISSN: 19326203 (2019).

- 623 31. Bi, E. *et al.* Involvement of an actomyosin contractile ring in *Saccharomyces cerevisiae* cytokine-  
624 sis. *Journal of Cell Biology* **142**, 1301–1312. ISSN: 00219525 (1998).
- 625 32. Klein, J. *et al.* TLM-tracker: Software for cell segmentation, tracking and lineage analysis in time-  
626 lapse microscopy movies. *Bioinformatics* **28**, 2276–2277. ISSN: 13674803 (2012).
- 627 33. Maška, M. *et al.* A benchmark for comparison of cell tracking algorithms. *Bioinformatics* **30**,  
628 1609–1617. ISSN: 14602059 (2014).
- 629 34. Di Talia, S., Skotheim, J. M., Bean, J. M., Siggia, E. D. & Cross, F. R. The effects of molecular  
630 noise and size control on variability in the budding yeast cell cycle. *Nature* **448**, 947–951 (2007).
- 631 35. Schmoller, K. M., Turner, J., Kõivomägi, M & Skotheim, J. M. Dilution of the cell cycle inhibitor  
632 Whi5 controls budding-yeast cell size. *Nature* **526**, 268–272 (2015).
- 633 36. Litsios, A. *et al.* Differential scaling between G1 protein production and cell size dynamics pro-  
634 motes commitment to the cell division cycle in budding yeast. *Nature cell biology* **21**, 1382–1392  
635 (2019).
- 636 37. Chen, Y., Zhao, G., Zahumensky, J., Honey, S. & Futcher, B. Differential scaling of gene expres-  
637 sion with cell size may explain size control in budding yeast. *Molecular cell* **78**, 359–370 (2020).
- 638 38. Qu, Y. *et al.* Cell cycle inhibitor Whi5 records environmental information to coordinate growth  
639 and division in yeast. *Cell reports* **29**, 987–994 (2019).
- 640 39. Barber, F., Amir, A. & Murray, A. W. Cell-size regulation in budding yeast does not depend on  
641 linear accumulation of Whi5. *Proceedings of the National Academy of Sciences* **117**, 14243–14250  
642 (2020).
- 643 40. Garmendia-Torres, C., Tassy, O., Matifas, A., Molina, N. & Charvin, G. Multiple inputs ensure  
644 yeast cell size homeostasis during cell cycle progression. *Elife* **7**, e34025 (2018).
- 645 41. Liu, X. *et al.* Reliable cell cycle commitment in budding yeast is ensured by signal integration.  
646 *Elife* **4**, e03977 (2015).
- 647 42. Leitao, R. M. & Kellogg, D. R. The duration of mitosis and daughter cell size are modulated by  
648 nutrients in budding yeast. *Journal of Cell Biology* **216**, 3463–3470 (2017).
- 649 43. Soifer, I., Robert, L. & Amir, A. Single-cell analysis of growth in budding yeast and bacteria  
650 reveals a common size regulation strategy. *Current Biology* **26**, 356–361 (2016).
- 651 44. Mayhew, M. B., Iversen, E. S. & Hartemink, A. J. Characterization of dependencies between  
652 growth and division in budding yeast. *Journal of the Royal Society Interface* **14**, 20160993 (2017).
- 653 45. Johnston, G., Ehrhardt, C., Lorincz, A & Carter, B. Regulation of cell size in the yeast *Saccha-*  
654 *romyces cerevisiae*. *Journal of bacteriology* **137**, 1–5 (1979).
- 655 46. Blank, H. M., Callahan, M., Pistikopoulos, I. P., Polymenis, A. O. & Polymenis, M. Scaling of G1  
656 duration with population doubling time by a cyclin in *Saccharomyces cerevisiae*. *Genetics* **210**,  
657 895–906 (2018).



- 658 47. Rudin, L. I., Osher, S. & Fatemi, E. Nonlinear total variation based noise removal algorithms.  
659 *Physica D* **60**, 259–268 (1992).
- 660 48. Stylianidou, S., Brennan, C., Nissen, S. B., Kuwada, N. J. & Wiggins, P. A. *Molecular Microbi-*  
661 *ology* **00** (2016).
- 662 49. Dietler, N. *et al.* A convolutional neural network segments yeast microscopy images with high  
663 accuracy. *Nature Communications* **11**, 1–8. ISSN: 20411723 (2020).
- 664 50. Schmidt, G. W., Frey, O. & Rudolf, F. The CellClamper: a convenient microfluidic device for  
665 time-lapse imaging of yeast. *Genome Instability*, 537–555 (2018).
- 666 51. Schmidt, G. W., Cuny, A. P. & Rudolf, F. Preventing photomorbidity in long-term multi-color  
667 fluorescence imaging of *Saccharomyces cerevisiae* and *S. pombe*. *G3: Genes, Genomes, Genetics*  
668 **10**, 4373–4385 (2020).
- 669 52. Lang, M., Rudolf, F. & Stelling, J. Use of YouScope to implement systematic microscopy proto-  
670 cols. *Current protocols in molecular biology* **98**, 14–21 (2012).
